# Supplementary material
Source: PubMed Central journal article supplement (PMC2962513)

Supplemental Fig. 1. High dose GW3965 significantly increases ABCA1 levels in cortex and hippocampus. In order to quantify band density, high dose treated samples were diluted either 3-fold (cortex) or 2-fold (hippocampus) and compared to undiluted controls. Panels are representative blots from individual mice from the following cohorts: APP/PS1 untreated control: N=7 (cortex), N=7 (hippocampus); APP/PS1 high dose therapeutic: N=10 (cortex), N=9 (hippocampus).

Supplemental Fig. 2. APP levels are unchanged in ABCA1-deficient or GW3965-treated mice. APP protein levels were analyzed in undiluted carbonate extracts of hippocampus and cortex. Representative Western blots are shown on the left. Values represent mean  $\pm$  SEM of APP levels from at least three independent experiments. Cohorts consisted of the following Ns: APP/PS1 untreated control: N=7 (cortex), N=8 (hippocampus); APP/PS1 prophylactic: N=8 (cortex) N=8 (hippocampus); APP/PS1 low dose therapeutic: N=8 (cortex), N=8 (hippocampus); APP/PS1 high dose therapeutic: N=10 (cortex), N=10 (hippocampus); ABCA1<sup>-/-</sup> APP/PS1 untreated control: N=4 (cortex), N=4 (hippocampus); ABCA1<sup>-/-</sup> APP/PS1 prophylactic: N=8 (cortex) N=8 (hippocampus); ABCA1<sup>-/-</sup> APP/PS1 low dose therapeutic: N=8 (cortex), N=7 (hippocampus); ABCA1<sup>-/-</sup> APP/PS1 high dose therapeutic: N=4 (cortex), N=4 (hippocampus).

Supplemental Fig. 3. CTF levels are unchanged in ABCA1-deficient or GW3965-treated mice. CTF protein levels were analyzed in undiluted carbonate extracts of hippocampus and cortex. Representative Western blots are shown on the left. Values represent mean  $\pm$  SEM of CTF $\alpha$  and CTF $\beta$  levels. Cohorts consisted of the following Ns: APP/PS1 untreated control: N=7 (cortex), N=8 (hippocampus); APP/PS1 prophylactic: N=8 (cortex) N=8 (hippocampus); APP/PS1 low dose therapeutic: N=7 (cortex), N=8 (hippocampus); APP/PS1 high dose therapeutic: N=10 (cortex), N=10 (hippocampus); ABCA1<sup>-/-</sup> APP/PS1 untreated control: N=3 (cortex), N=4 (hippocampus); ABCA1<sup>-/-</sup> APP/PS1 prophylactic: N=8 (cortex) N=8 (hippocampus); ABCA1<sup>-/-</sup> APP/PS1 low dose therapeutic: N=6 (cortex), N=7 (hippocampus); ABCA1<sup>-/-</sup> APP/PS1 high dose therapeutic: N=4 (cortex), N=4 (hippocampus).

Supplemental Fig. 4. Effect of GW3965 and ABCA1 on the proportion of oligomeric:total A $\beta$ . Nitrocellulose membranes were spotted with cortical carbonate extracts in duplicate and immunoblotted with A11 and 6E10 antibodies. Data represent mean  $\pm$  SEM of oligomeric, total, and oligomeric:total A $\beta$  levels. Cohorts consisted of the following Ns: APP/PS1 untreated control: N=7 (cortex), N=8 (hippocampus); APP/PS1 prophylactic: N=8 (cortex) N=8 (hippocampus); APP/PS1 low dose therapeutic: N=8 (cortex), N=8 (hippocampus); APP/PS1 high dose therapeutic: N=7 (cortex), N=8 (hippocampus); ABCA1<sup>-/-</sup> APP/PS1 untreated control: N=7 (cortex), N=7 (hippocampus); ABCA1<sup>-/-</sup> APP/PS1 prophylactic: N=8 (cortex) N=8 (hippocampus); ABCA1<sup>-/-</sup> APP/PS1 low dose therapeutic: N=8 (cortex), N=8 (hippocampus); ABCA1<sup>-/-</sup> APP/PS1 high dose therapeutic: N=4 (cortex), N=4 (hippocampus).

# Supplemental Figure 1

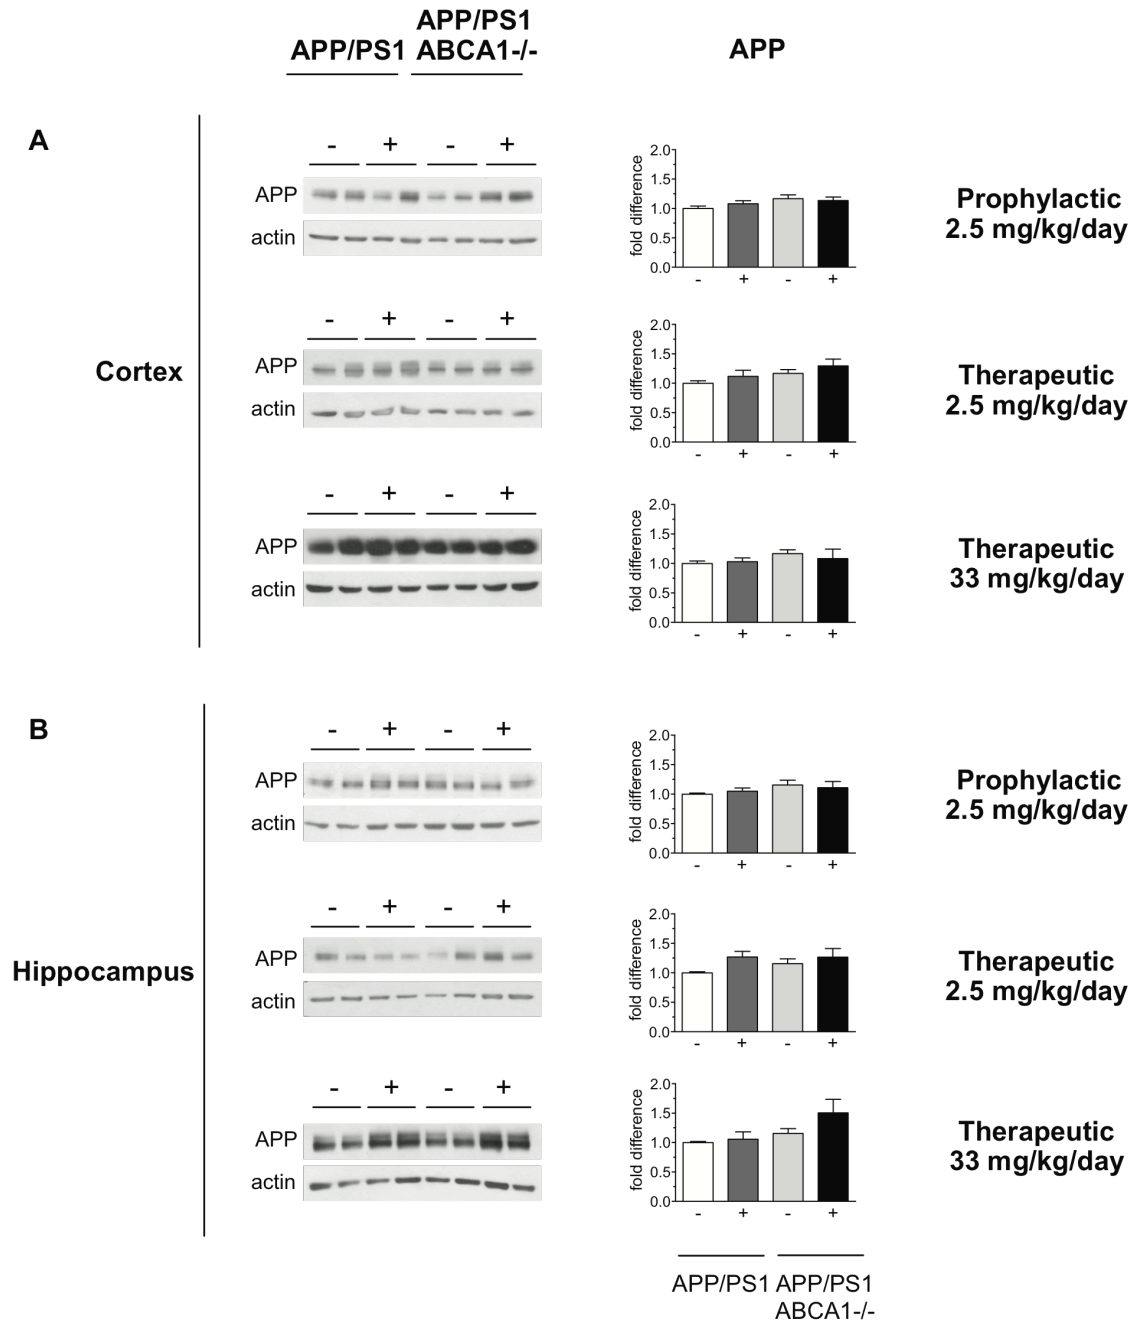

Supplemental Figure 2

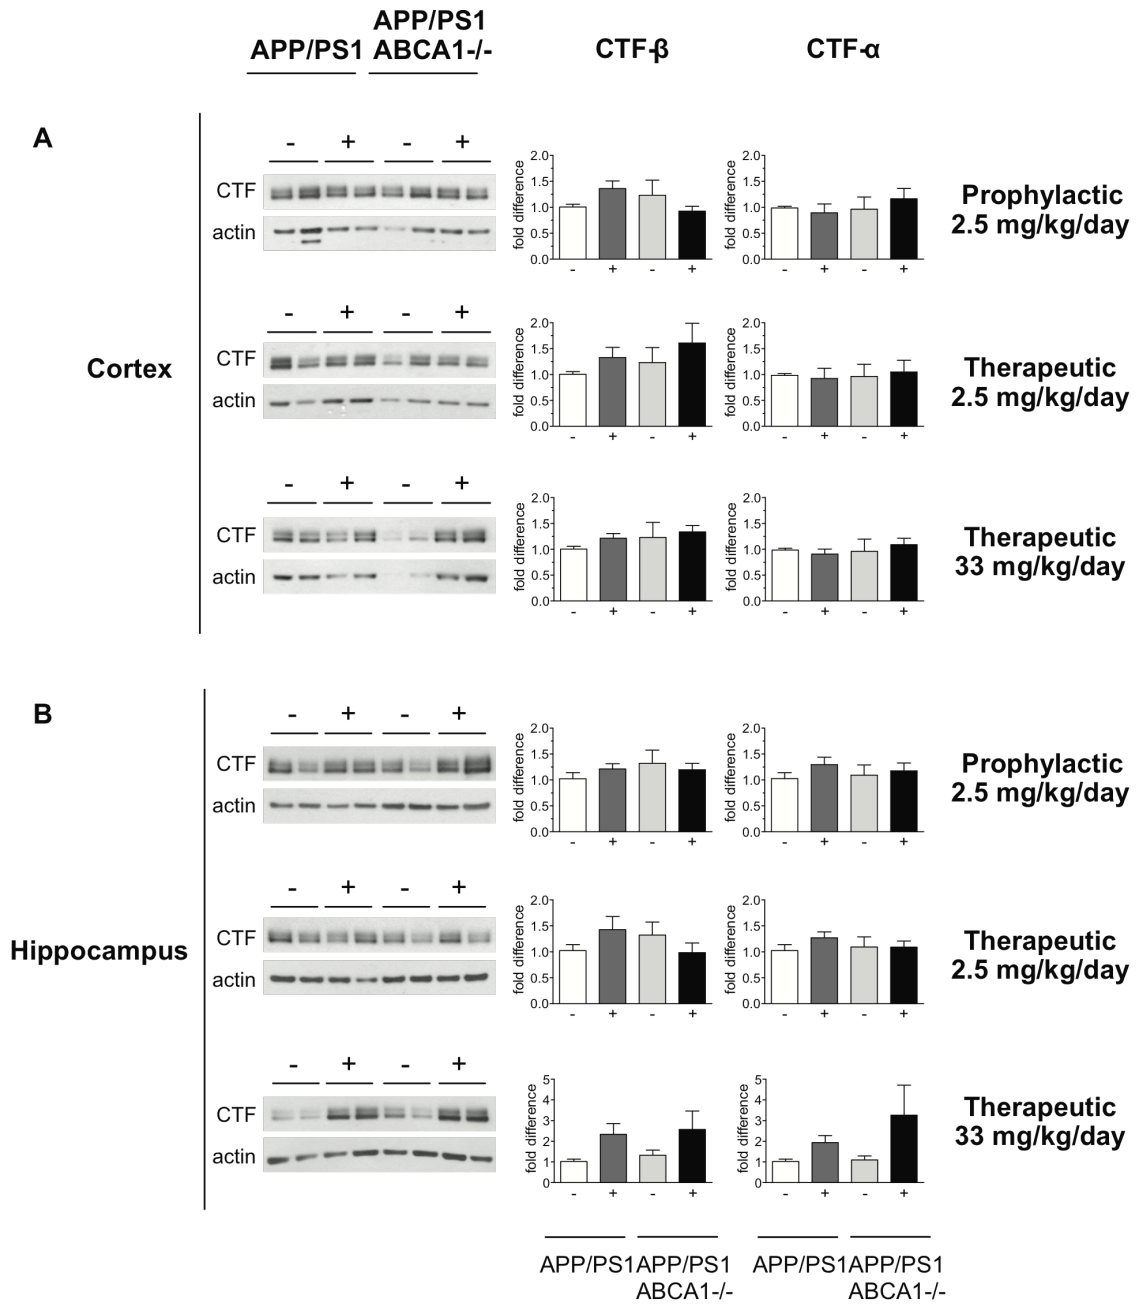

### Supplemental Figure 3

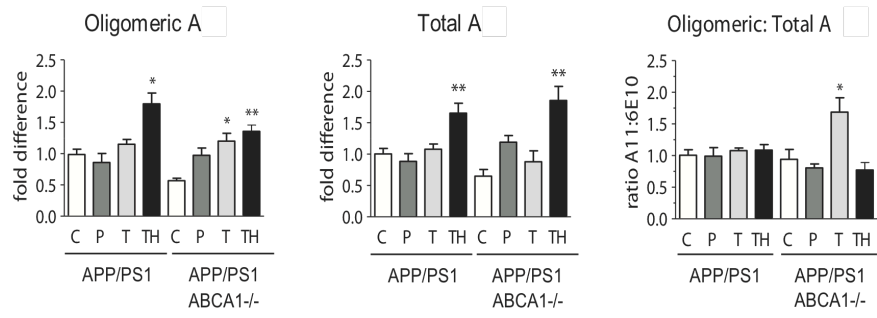

**Supplemental Figure 4**

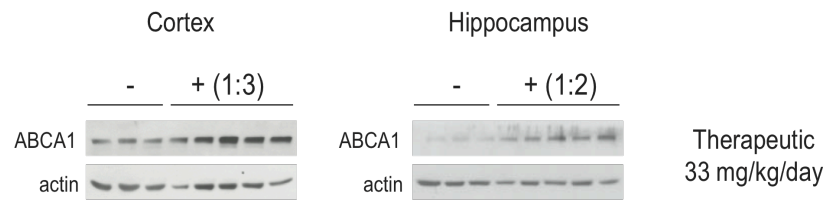

Supplement: supp_M110.108100_2010-108100supplemental.pdf [file supp_M110.108100_2010-108100supplemental.pdf]
